# Supplementary material for: Liquid-assisted grinding/compression: a facile mechanosynthetic route for the production of high-performing Co–N–C electrocatalyst materials
Source: Royal Society of Chemistry journal article supplement (doi:10.1039/d1gc03433b), 2021-12-10
Supplement: d1gc03433b1.pdf [file d1gc03433b1.pdf]

*Supplementary Information*

*for*

**Liquid-assisted grinding/compression: A facile mechanochemical route for the production of high-performing Co-N-C electrocatalyst materials**

Akmal Kosimov,<sup>a</sup> Gulnara Yusibova,<sup>a</sup> Jaan Aruväli,<sup>b</sup> Päärn Paiste,<sup>b</sup> Maike Käärik,<sup>a</sup> Jaan Leis,<sup>a</sup> Arvo Kikas,<sup>c</sup> Vambola Kisand,<sup>c</sup> Krišjānis Šmits,<sup>d</sup> and Nadezda Kongi,<sup>a\*</sup>

<sup>a</sup> *Institute of Chemistry, University of Tartu, Tartu 50411, Estonia*

<sup>b</sup> *Institute of Ecology and Earth Sciences, University of Tartu, Tartu 50411, Estonia*

<sup>c</sup> *Institute of Physics, University of Tartu, Tartu 50411, Estonia*

<sup>d</sup> *Institute of Solid State Physics, University of Latvia, LV-1063 Riga, Latvia*

\* Corresponding author: [nadezda.kongi@ut.ee](mailto:nadezda.kongi@ut.ee) (Nadezda Kongi)

**Table S1.** Comparison of the proposed mechanochemical template-assisted methodologies with the solution-based analogues.

| Product            | Synthesis conditions                                   | Pyrolysis conditions                                                                                   | Workup conditions                                                    | Solvent*<br>(ml/1 g of product) | Overall reaction time | Reference        |
|--------------------|--------------------------------------------------------|--------------------------------------------------------------------------------------------------------|----------------------------------------------------------------------|---------------------------------|-----------------------|------------------|
| CoNC-LAG           | Liquid-assisted grinding/ r.t., 20 min                 | Ramping 20 °C min <sup>-1</sup><br>T=700 °C/2 h                                                        | Leaching: 1M HCl, 3 h, 70 °C                                         | EtOH (1.3 ml)                   | 5.5 h                 | <i>This work</i> |
| 3D-CoNC-LAG        | Liquid-assisted grinding/ r.t., 20 min                 | Ramping 20 °C min <sup>-1</sup><br>T=700 °C/2 h                                                        | Washing: H <sub>2</sub> O, 1 h, r.t.<br>Leaching: 1M HCl, 3 h, 70 °C | EtOH (1.3 ml)                   | 6.5 h                 | <i>This work</i> |
| 3D-CoNC-LAC        | Liquid-assisted compression/ r.t., 20 min              | Ramping 20 °C min <sup>-1</sup><br>T=700 °C/2 h                                                        | Washing: H <sub>2</sub> O, 1h, r.t.<br>Leaching: 1M HCl, 3 h, 70 °C  | EtOH (1.3 ml)                   | 6 h                   | <i>This work</i> |
| 3D-CoNC-LAG-LAC    | Liquid-assisted grinding and compression/ r.t., 30 min | Ramping 20 °C min <sup>-1</sup><br>T=700 °C/2 h                                                        | Washing: H <sub>2</sub> O, 1 h, r.t.<br>Leaching: 1M HCl, 3 h, 70 °C | EtOH (1.3 ml)                   | 6.5 h                 | <i>This work</i> |
| 3D-Co-N-C          | Stirring for 5 h at r.t.                               | T=900 °C/2h                                                                                            | Washing: no data<br>Leaching: 0.5M HCl, 12 h                         | No data                         | 19 h                  | 1                |
| FeN/C-900@NaCl-A-1 | Stirring for 12 h at r.t.                              | 1) Ramping 10 °C min <sup>-1</sup> , T=900 °C/2 h<br>2) Ramping 10 °C min <sup>-1</sup> , T=900 °C/1 h | Washing: no data<br>Leaching: 1M HCl                                 | No data                         | 40 h                  | 2                |

\*Water was not taken into account

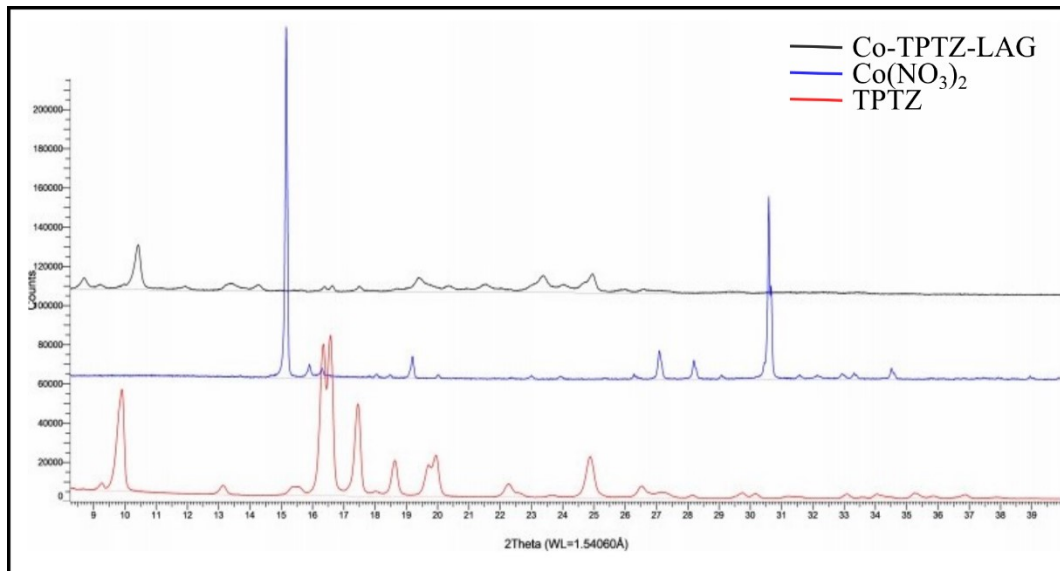

**Figure S1.** Comparative PXRD patterns of Co-TPTZ-LAG,  $\text{Co}(\text{NO}_3)_2$ , and TPTZ

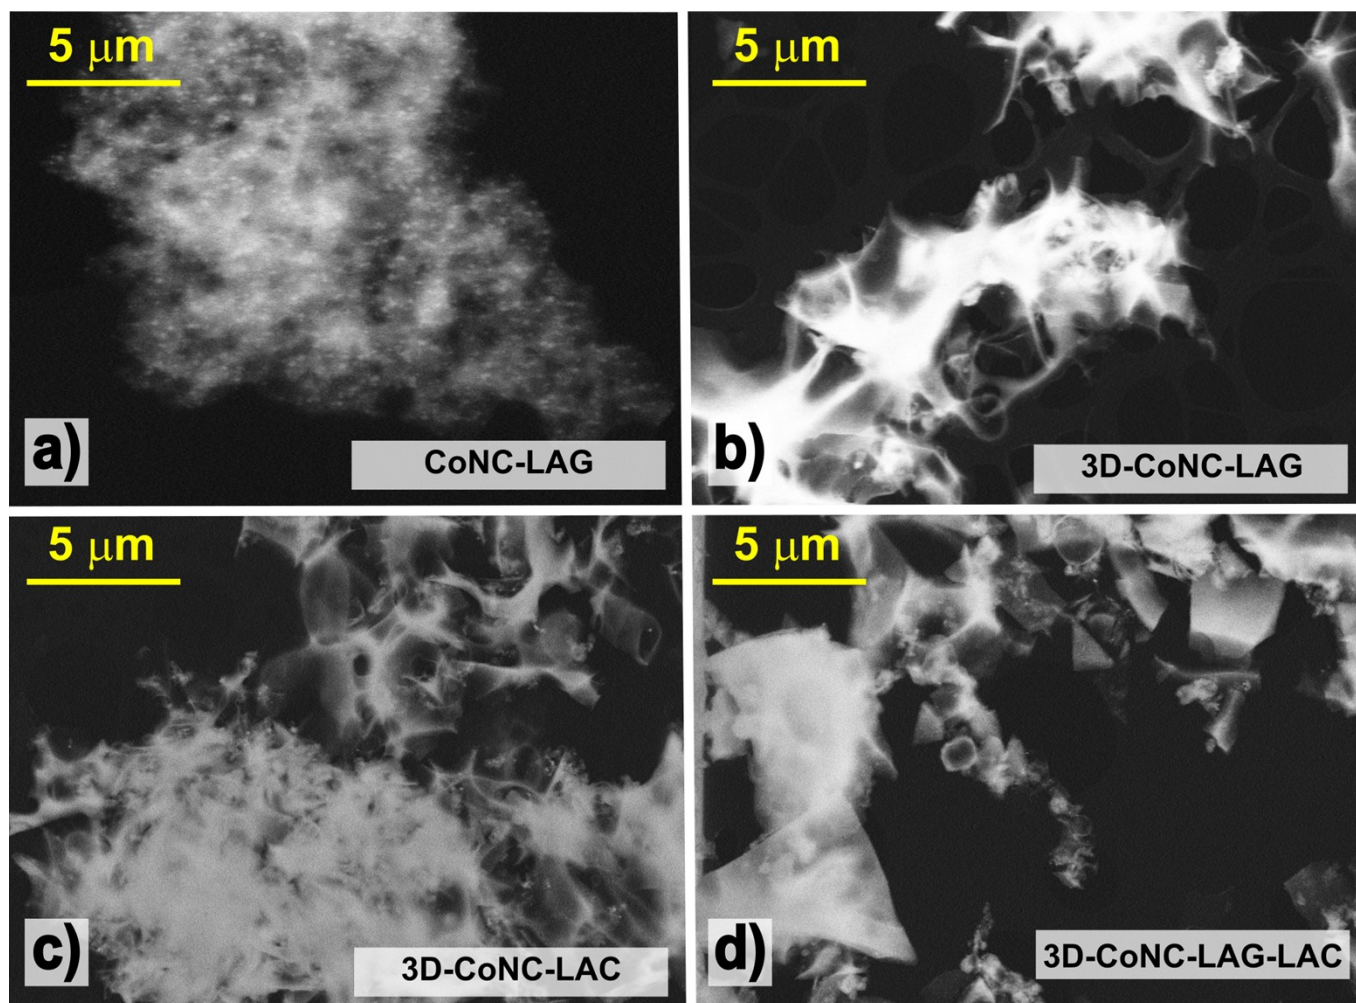

**Figure S2.** STEM images of (a) CoNC-LAG, (b) 3D-CoNC-LAG, (c) 3D-CoNC-LAC, and (d) 3D-CoNC-LAG-LAC.

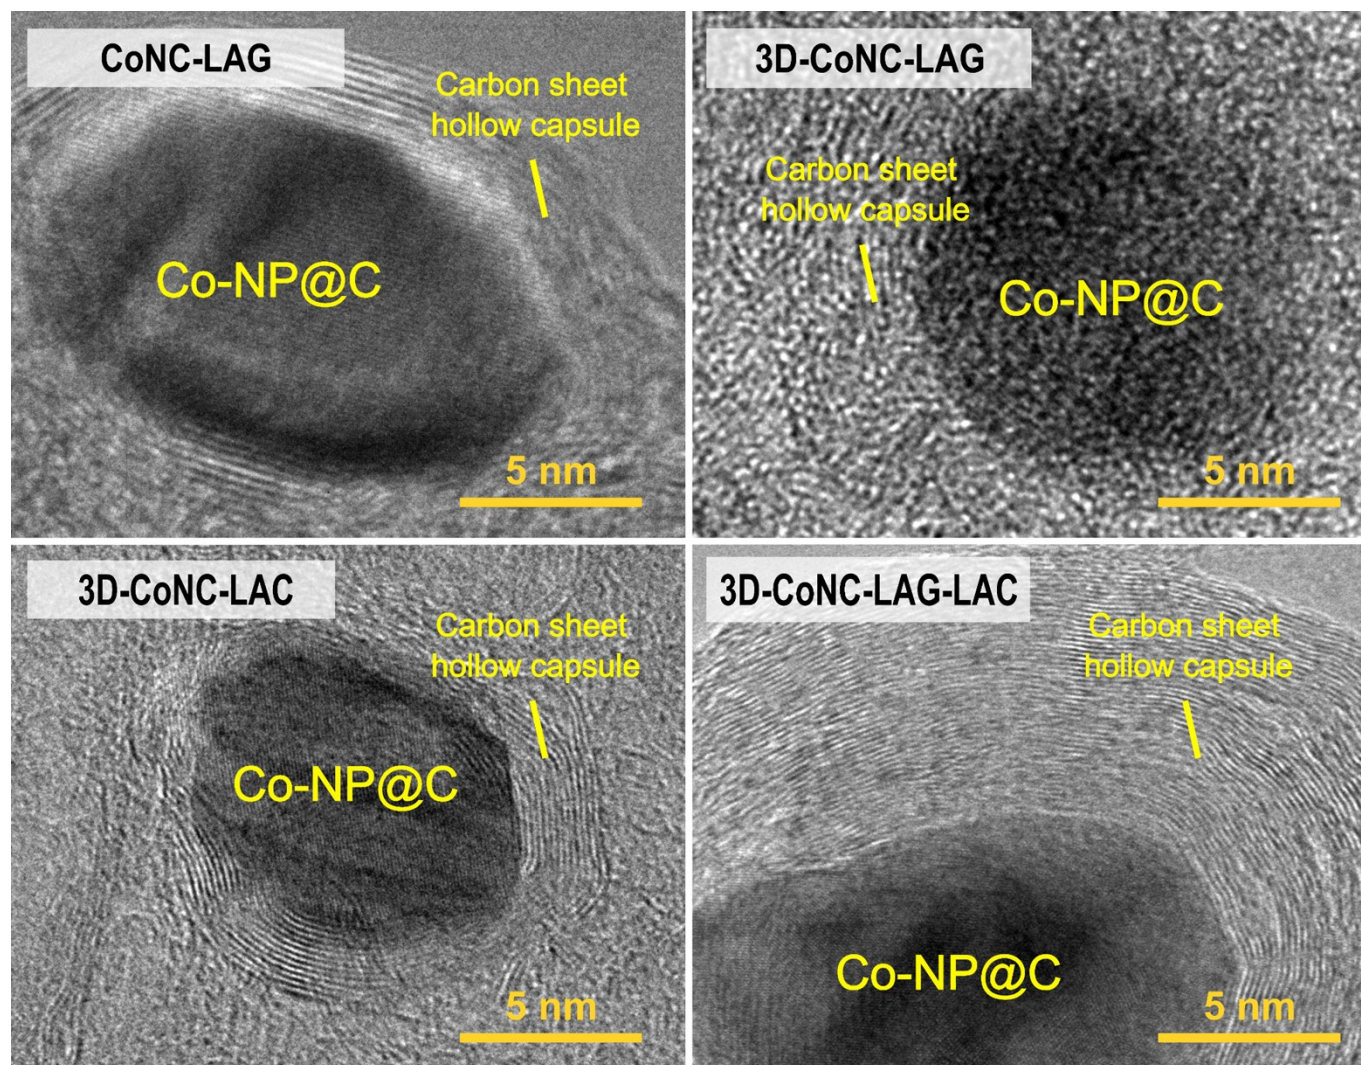

**Figure S3.** HR-TEM images of Co-nanoparticles coated by carbon sheets forming hollow nanocapsules within the catalyst materials.

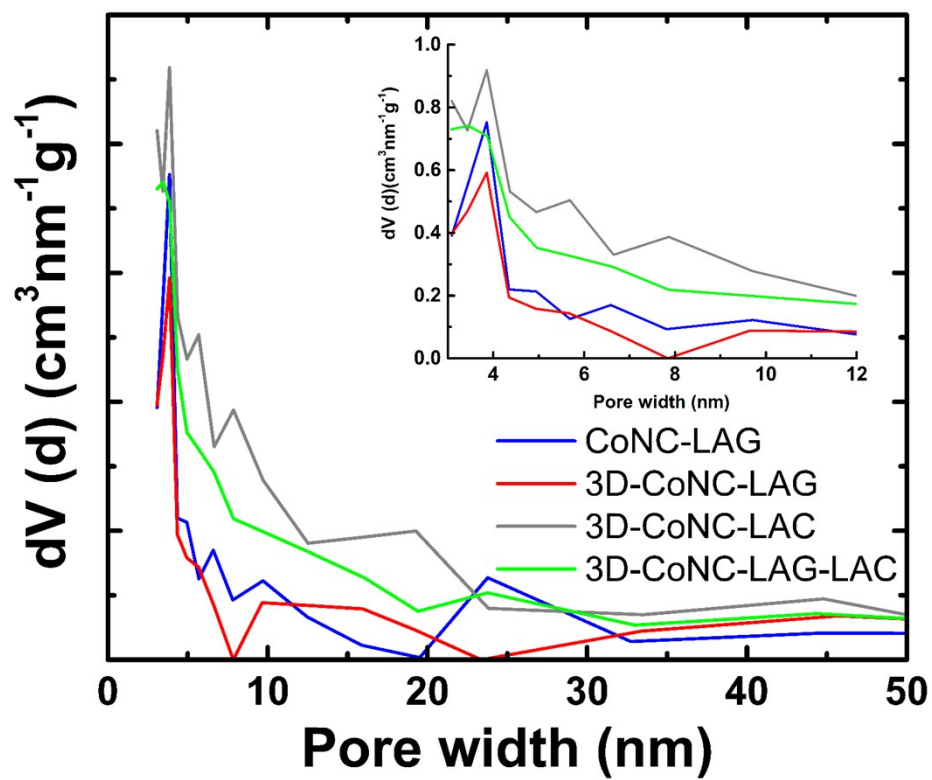

Figure S4. Pore size distribution among the Co-N-C catalysts.

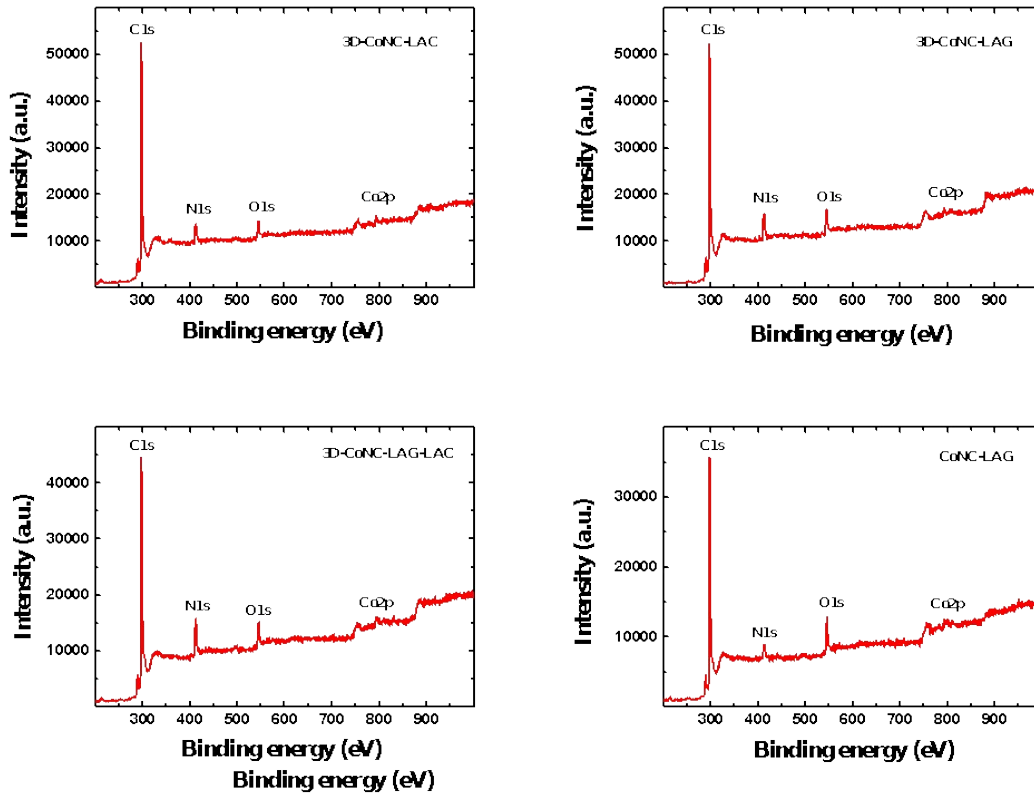

**Figure S5.** Survey XPS spectra recorded for all investigated samples.

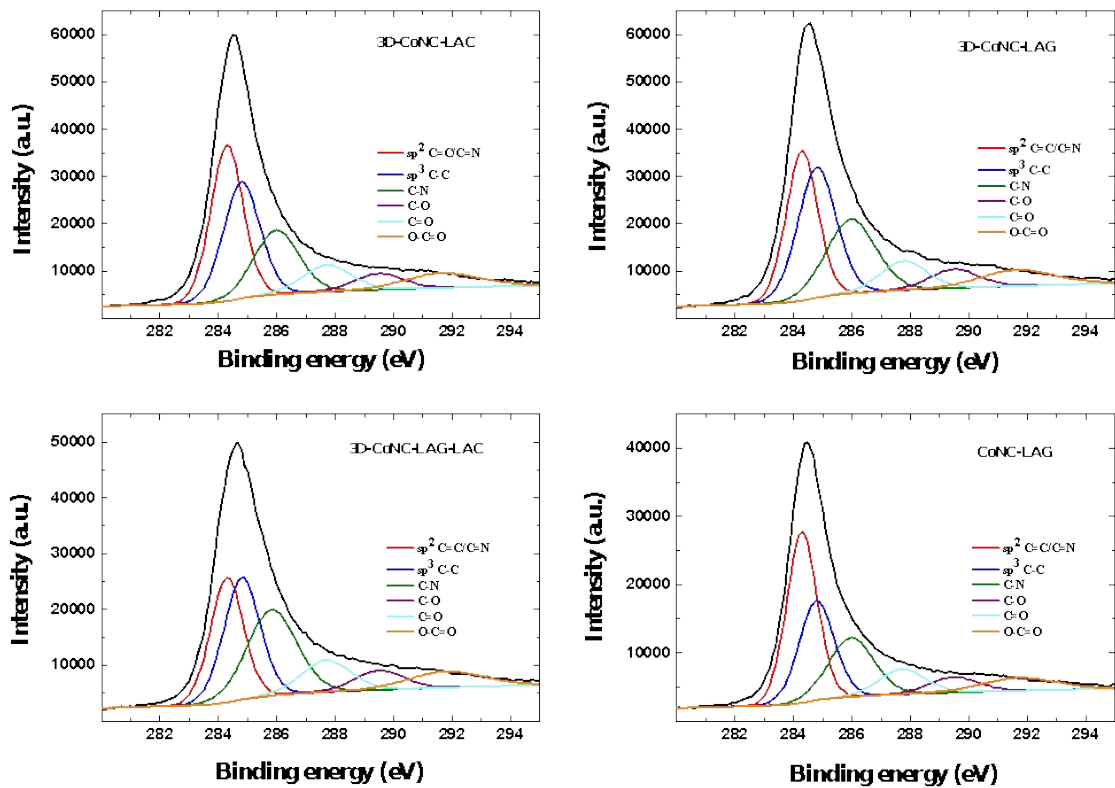

Figure S6. Deconvoluted high-resolution C1s photoelectron spectra of the obtained catalysts.



**Table S2.** Comparison of ORR/OER bifunctional activity ( $\Delta E = E_{10}^{\text{OER}} - E_{1/2}^{\text{ORR}}$ ) for recently reported Co-N-C based composites.

| Catalyst                                                | $E_{1/2}$ (V)<br>ORR | $E_{\text{onset}}$ (V)<br>ORR | $E_{j=10}$<br>OER (V) | $\Delta E$ (V) | Ref.             |
|---------------------------------------------------------|----------------------|-------------------------------|-----------------------|----------------|------------------|
| 3D-CoNC-LAG-LAC                                         | 0.83                 | 0.98                          | 1.70                  | 0.87           | <i>This work</i> |
| Co-N-3DOM/mC                                            | 0.85                 | 0.95                          | 1.67                  | 0.82           | 3                |
| Co/MMCs                                                 | 0.84                 | 1.00                          | 1.41                  | 0.57           | 4                |
| 3DOM Co@N C-1-090                                       | 0.88                 | 1.04                          | 1.50                  | 0.62           | 5                |
| CoSAs@CNTs                                              | 0.86                 | 0.99                          | 1.64                  | 0.78           | 6                |
| Co <sub>2</sub> N <sub>0.67</sub> -BHPC                 | 0.86                 | 0.93                          | 1.57                  | 0.71           | 7                |
| TAL-2-900                                               | 0.85                 | 1.00                          | 1.60                  | 0.75           | 8                |
| Co-N/PDC                                                | 0.80                 | 0.86                          | 1.59                  | 0.79           | 9                |
| Co-N/CDC                                                | 0.80                 | 0.88                          | 1.59                  | 0.79           | 9                |
| Co@N-HCCs@NG                                            | 0.86                 | 0.98                          | 1.53                  | 0.67           | 10               |
| CoO <sub>x</sub> /CoN <sub>y</sub> @CN <sub>z,700</sub> | 0.83                 | 0.90                          | 1.51                  | 0.70           | 11               |
| UNT Co SAs/N-C                                          | 0.89                 | 0.97                          | 1.61                  | 0.72           | 12               |

**Table S3.** Comparison of the proposed mechanochemical template-assisted methodology with recently reported procedures for production of Co-N-C based electrocatalysts.

| Product                                                | Synthesis conditions                                                                                         | Pyrolysis conditions                            | Workup conditions                                                    | Solvent* (ml/1 g of product)*                 | Overall reaction time | Reference |
|--------------------------------------------------------|--------------------------------------------------------------------------------------------------------------|-------------------------------------------------|----------------------------------------------------------------------|-----------------------------------------------|-----------------------|-----------|
| 3D-CoNC-LAG-LAC                                        | Liquid-assisted grinding and compression/r.t., 30 min                                                        | Ramping 20 °C min <sup>-1</sup><br>T=700 °C/2 h | Washing: H <sub>2</sub> O, 1 h, r.t.<br>Leaching: 1M HCl, 3 h, 70 °C | EtOH (1.3 ml)                                 | 6.5 h                 | This work |
| Co-N-3DOM/mC                                           | 1) Mixing of SMs*/30 min<br>2) Polymerization/<br>T=100 °C, 24 h                                             | 1) T=350 °C/2 h<br>2) T=900 °C/3 h              | -                                                                    | <i>i</i> -proparnol (7 ml)<br>Ethanol (20 ml) | 29 h                  | 3         |
| Co/MMCs                                                | 1) Electrodeposition/10 min<br>2) Co-incorporation T=60 °C/<br>8.5 h                                         | T=800 °C/2 h                                    | -                                                                    | DMF (6 ml)                                    | 11 h                  | 4         |
| 3DOM Co@N C-1-090                                      | 1) SiO <sub>2</sub> templating/T=60 °C<br>2) MOF templating/T=90 °C                                          | T=800 °C/3 h                                    | SiO <sub>2</sub> etching:<br>HF (5%)                                 | DMF (80 ml)                                   | no data               | 5         |
| CoSAs@CNTs                                             | 1) ZIF-67 synthesis/r.t., 4.5 h<br>2) ZIF-67 drying/60 °C, 10 h                                              | T=750 °C/2 h                                    | Washing:<br>HCl, MeOH                                                | MeOH (25 ml)                                  | 16.5 h                | 6         |
| Co <sub>2</sub> N <sub>0.67</sub> -BHPC                | 1) Mushrooms drying/ T=120 °C, 24 h<br>2) MR: H <sub>2</sub> TPP1/CoTPP synthesis: stirring/r.t., 5 h        | Ramping 5 °C min <sup>-1</sup><br>T=700 °C/2 h  | -                                                                    | DCM (no data)                                 | 31 h                  | 7         |
| Co-N/PDC                                               | Co-N/PDC synthesis/ r.t., ball mill, 2 h                                                                     | 1) T=800 °C/3 h<br>2) T=800 °C/1.5 h            | -                                                                    | -                                             | 6.5 h                 | 8         |
| CoO <sub>x</sub> /CoN <sub>y</sub> @CN <sub>z,70</sub> | 1) CoPc@MCA synthesis/r.t.<br>2) CoPc@MCA drying/60 °C                                                       | Ramping 2 °C min <sup>-1</sup><br>T=700 °C/2 h  | -                                                                    | DMSO (55 mL)                                  | no data               | 11        |
| UNT Co SAs/N-C                                         | 1) UNT CCH synthesis/150 °C, 12 h<br>2) UNT-ZIF-67 synthesis/150 °C, 2 h<br>3) UNT-ZIF-67 drying/70 °C, 12 h | Ramping 5 °C min <sup>-1</sup><br>T=500 °C/2 h  | -                                                                    | -                                             | 26 h                  | 12        |

\*Water was not taken into account

## References

1. C. Guo, Y. Li, W. Liao, Y. Liu, Z. Li, L. Sun, C. Chen, J. Zhang, Y. Si and L. Li, *J. Mater. Chem. A*, 2018, **6**, 13050–13061.
2. C. Guo, R. Zhou, Z. Li, Y. Si, W. Liao, W. Sun, S. Xiang, X. Luo, M. Luo and Z. Luo, *Microporous Mesoporous Mater.*, 2020, **303**, 110281.
3. Z. Meng, N. Chen, S. Cai, R. Wang, W. Guo and H. Tang, *Int. J. Energy Res.*, 2021, **45**, 6250–6261.
4. N. Huang, L. Yang, M. Zhang, S. Yan, Y. Ding, P. Sun and X. Sun, *ChemElectroChem*, 2019, **6**, 4522–4532.
5. Z. Cai, S. Lin, J. Xiao, T. Muhmood and X. Hu, *Adv. Mater. Interfaces*, 2021, **8**, 2001922.
6. S. Dilpazir, H. He, Z. Li, M. Wang, P. Lu, R. Liu, Z. Xie, D. Gao and G. Zhang, *ACS Appl. Energy Mater.*, 2018, **1**, 3283–3291.
7. X. Lv, Z. Xiao, H. Wang, X. Wang, L. Shan, F. Wang, C. Wei, X. Tang and Y. Chen, *J. Energy Chem.*, 2021, **54**, 626–638..
8. K. Ping, M. Alam, S. R. Kahnert, R. Bhadoria, A. Mere, V. Mikli, M. Käärrik, J. Aruväli, P. Paiste, A. Kikas, V. Kisand, I. Järving, J. Leis, N. Kongi and P. Starkov, *Mater. Adv.*, 2021, **2**, 4009–4015.
9. P. Teppor, R. Jäger, M. Paalo, R. Palm, O. Volobujeva, E. Härk, Z. Kochovski, T. Romann, R. Härmas, J. Aruväli, A. Kikas and E. Lust, *Electrochem. Commun.*, 2020, **113**, 106700.
10. Y. Zhang, P. Wang, J. Yang, S. Lu, K. Li, G. Liu, Y. Duan and J. Qiu, *Carbon*, 2021, **177**, 344–356.
11. J. Liu, C. Wang, H. Sun, H. Wang, F. Rong, L. He, Y. Lou, S. Zhang, Z. Zhang and M. Du, *Appl. Catal. B Environ.*, 2020, **279**, 119407.
12. X. Sun, S. Sun, S. Gu, Z. Liang, J. Zhang, Y. Yang, Z. Deng, P. Wei, J. Peng, Y. Xu, C. Fang, Q. Li, J. Han, Z. Jiang and Y. Huang, *Nano Energy*, 2019, **61**, 245–250.
